# 1 Time- and size-resolved bacterial aerosol dynamics in 2 highly polluted air: new clues for haze formation 3 mechanism

4  
5 Ting Zhang, Xinyue Li, Minfei Wang, Haoxuan Chen and  
6 Maosheng Yao\*

7  
8 State Key Joint Laboratory of Environmental Simulation and Pollution  
9 Control, College of Environmental Sciences and Engineering, Peking  
10 University, Beijing 100871, China

11  
12 Submitted to  
13 *bioRxiv*

## 14 15 \* Corresponding Author:

16 Maosheng Yao, PhD  
17 Boya Distinguished Professor  
18 State Key Joint Laboratory of Environmental Simulation and Pollution Control,  
19 College of Environmental Sciences and Engineering,  
20 Peking University, Beijing 100871, China  
21 Email: yao@pku.edu.cn  
22 Ph: +86 01062767282

23 Jan 6, 2019

24 Beijing, China

25

26

## Abstract

Aerosol chemistry is often studied without considering microbial involvements. Here, we have applied a high-volume (1 m<sup>3</sup>/min) aerosol sampler and the Micro-Orifice Uniform Deposit Impactor (NanoMoudi) along with molecular and microscopic methods to investigate time-and size-resolved bacterial aerosol dynamics in air. Under high particulate matter (PM) polluted episodes, bacterial aerosols were detected to have a viability up to 50-70% in the 0.56-1 µm size range, at which elevated levels of SO<sub>4</sub><sup>2-</sup>, NO<sub>3</sub><sup>-</sup> and NH<sub>4</sub><sup>+</sup> were concurrently observed. Engineered or acclimated for both pharmaceuticals and wastewater treatment, bacteria such as *Psychrobacter* spp., *Massilia* spp., *Acinetobacter lwoffii*, *Exiguobacterium aurantiacum*, and *Bacillus megaterium* were shown to have experienced massive abundance shifts in polluted air on early mornings and late afternoons, on which were previously reported to witness rapid new particle formation events. For example, *Acinetobacter* spp. were shown to account for > 96% abundance at a corresponding PM<sub>2.5</sub> level of 208 µg/m<sup>3</sup>. The bacterial aerosol changes corresponded to the observed PM<sub>2.5</sub> mass peak shift from 3.2-5.6 µm to the high viability size range of 0.56-1µm. Additionally, it is interesting that elevated levels of soluble Na, Ca, Mg, K, Al, Fe and P elements that are required for bacterial growth were observed to co-occur with those significant bacterial aerosol structure shifts in the air. For particular time-resolved PM<sub>2.5</sub> pollution episodes, *Acinetobacter* and *Massilia* were shown to alternate in dominating the time-resolved aerosol community structures. The results from a HYSPLIT trajectory model simulation suggested that the role by air mass transport in affecting the observed bacterial

aerosol dynamics could be minor. As an evidence, we found that *Acinetobacter*, *Psychrobacter*, *Exiguobacterium*, and *Bacillus* genera were emitted into the air with a level of > 3000 CFU/m<sup>3</sup> from a pharmaceutical plant. In addition, high level of VOCs up to 15,030 ppbv, mainly Acetone (61%) and Acetaldehyde (11%), were also detected in the air inside the plant. All the data including size-resolved viability and time-resolved bacterial aerosol dynamics together with their growth conditions detected in the air suggested that airborne bacteria in the size range of 0.56- 1µm could have played important roles for haze formation in Beijing. The results about time- and size-resolved bacterial aerosol dynamics from this work provide a fresh understanding of aerosol chemistry especially in highly polluted air. It is hoped that these findings could lend a support in future cost-effective air pollution control practices.

**Keywords:** Bacterial aerosol dynamics in the air, Particulate matter, Size-and Time-resolved bacterial aerosol, Aerosol chemistry

## 1. Introduction

Air pollution has become one of serious environmental challenges facing mankind in modern society. Among many others, the core question about air pollution episode is : what is the driving force for accelerating the rapid fine particle growth in typical haze events? Regarding the PM<sub>2.5</sub> precursor VOC, some studies report that current models underestimate atmospheric VOC emission and also OH radical reactivity(Whalley et al., 2016). Experiments have shown that a direct source of

extremely low volatile organic compounds, i.e., a possible new particle formation precursor, was observed from the OH oxidation of acyclic and exocyclic terpenes and isoprene (Jokinen et al., 2015). In another work, it was found that the new particle formation rate, in addition to one-hour lag in time compared to the observation, in the size range of 6-10 nm was significantly underestimated by WRF-Chem and MALTE-BOX models(Huang et al., 2016). These studies collectively imply that there are some uncertainties and unexpected outcomes in measurements of VOCs, new particles and OH reactivity by both aerosol chemistry models and field campaigns.

Although biological materials such as bacteria are increasingly being investigated during haze episodes, their roles in the PM<sub>2.5</sub> formation have never been studied or considered. Thus, it is completely unclear if the biological materials have a role in the haze occurrence. In the past, during the haze episodes the levels of fluorescent bioaerosol (described to be viable) particles were shown to be elevated in the size ranges of less than 1  $\mu\text{m}$ (Wei et al., 2016). In addition, endotoxin, an important bacterial membrane component, was also shown to be twice that on clear days(Wei et al., 2016). In other studies, culturable bacterial levels were shown to be higher during the haze periods than those during clear days(Liu et al., 2018;Gao et al., 2016;Gao et al., 2015a;Cao et al., 2014). Among the bacterial genera, *Bacillales*, *Actinomycetales*, *Pseudomonadales* were detected to dominate the community(Cao et al., 2014;Pöschl et al., 2010). For climate, evidences show that certain bacteria could serve as an ice nucleator or cloud condensation nuclei (Fröhlich-Nowoisky et al.,

2016;Šantl-Temkiv et al., 2015;Pöschl et al., 2010), and they might undergo metabolisms even at lower temperatures(Price and Sowers, 2004). Unfortunately, all these studies did not consider the microbial roles in atmospheric aerosol chemistry or the formation of haze episodes.

Here, this work was conducted to investigate the following questions: 1) if certain bacteria experience a rapid massive increase at particular times in highly polluted air?; 2) If so, in which size and what are the species?; 3) Are there any differences in bacterial dynamics during day and night time for a typical haze episode? ; 4) If bacterial growth conditions are available in highly polluted air? The answers to these questions will be of great value in providing new insights on the long-sought haze formation mechanism.

## **2. Materials and methods**

### ***2.1 Particulate matters (PM) collection***

#### ***2.1.1 PM sample collection using the NanoMoudi***

Size-resolved particulate matter samples were collected using Micro-Orifice Uniform Deposit Impactor (NanoMoudi) (MSP, USA) with 13 stages (stage 1: 10-18 µm; stage 2: 5.6-10 µm; stage 3: 3.2-5.6 µm; stage 4: 1.8-3.2 µm; stage 5: 1.0-1.8 µm; stage 6: 0.56-1.0 µm; stage 7: 0.32-0.56 µm; stage 8: 0.18-0.32 µm; stage 9: 0.1-0.18 µm; stage 10: 0.056-0.01 µm; stage 11: 0.032-0.056 µm; stage 12: 0.018-0.032 µm; and stage 13: 0.01-0.018 µm) near the Environmental Building on Peking University

campus(40°00'N, 116°32'E). For each experiment, the NanoMoudi at a sampling flow rate of 28 L/min was placed at 1.5 m above the ground. For the NanoMoudi experiment, six sets of samples were obtained on 47 mm (stage 1 to 10) and 90 mm (stage 11 to 13) aluminum membranes from Sep. 11, 2017 to Sep.14, 2017, during which a high PM<sub>2.5</sub> pollution episode occurred. The sampling time was categorized into the day-time (Day): from 7:00 AM to 7:00 PM, and the night-time (Night): from 8:00 PM to 6:00 AM.

Before and after sampling, aluminum membranes on each stage of the sampling device were weighed using a microbalance after conditioned at constant temperature (24.5°C) and humid (50%) for at least 48 h in advance. The membrane with samples on each stage of the NanoMoudi was then placed into a 15 mL tube and soaked in 4 mL 0.05% tween 20 water, and the sealed tubes were placed at 4°C in a shaker operated with a rotation speed of 200 rpm continuously for 4 hours. Finally, all the well-mixed sample extracts were kept at -20°C immediately before any analysis. For the quality controls, all aluminum membranes and the sampler were washed by absolute ethyl alcohol before use. And blank membranes without the air sampling were also brought to the sampling site which was later incorporated into the sample analysis as the negative control.

## **2.2 Time-resolved bacterial aerosol samples collected using the HighBioTrap sampler**

Between February 2018 and May 2018, air samples were collected for a 24-hr time

period for each day in three different pollution episodes (14 -208  $\mu\text{g}/\text{m}^3$ ) using the HighBioTrap sampler (Beijing dBlue Tech, Inc, Beijing, China) at an air flow rate of 1000 L/min for 20 min for each sample on Peking University campus (40°00'N, 116°32'E). The detailed sampling protocol was described for the HighBioTrap in our previous work(Chen and Yao, 2018). For each PM<sub>2.5</sub> pollution episode, particulate matter samples were collected in duplicates using the HighBioTrap at an interval of every 2 or 4 hours on an aluminum membrane coated with 600  $\mu\text{L}$  mineral oil at a height of 1.5 m above the ground. Specific sampling times and meteorological conditions are provided in the Table S1 (Supporting Information). Here, two air samples with 20 m<sup>3</sup> air were collected using the high-volume sampler for each specific time period. As a comparison, bacterial aerosol samples were also collected using the HighBioTrap in a pharmaceutical plant to study the bacterial emissions into the air. After each sampling, the mineral-oil-coated membrane was washed by 1.5 mL 0.05% tween 20 water, then the oil-in-water emulsion was centrifuged to remove the mineral oil supernatant at a speed of 7000 rpm using a centrifuge (5804r, Eppendorf, German). After a mixing process, the sample extracts were kept at -20°C immediately before any analysis. For total bacteria and their community structures, 78 samples and 2 negative control samples (blank membrane samples) were analyzed using qPCR and Illumina platforms (Sangon Biotech, Inc., Shanghai, China) as described in in Supplementary Text. Besides, bacterial species identifications were also performed using VITKE MS and MICROFLEX as described in Supplementary Text. As a comparison, air samples were also collected using the 4-Channel Particulate Matter Sampler as documented in Supplementary Text.

Besides, air samples from a pharmaceutical plant were also collected using Silonite™ Classical Canisters (Entech Instruments, Simi Valley, CA 93065), and their corresponding volatile organic compounds (VOCs) levels were further analyzed (Wuhan Tianhong Instruments Co., Ltd.) according to a previously published protocol<sup>34</sup>.

### **2.3 PM-borne *Endotoxin assay using the LAL assay, bacterial viability using DNA stain method, and reactive oxygen species (ROS) using DL-Dithiothreitol (DTT) assay***

The samples collected from the NanoMoudi were first centrifuged at 4°C at 3000 rpm in 10 min, and the supernatants were then transferred to the new tubes for the Limulus amebocyte lysate (LAL) assay. A 5-point standard curve from 0.005 to 50.0 EU/ml was generated using 10-fold serial dilutions of endotoxin standards (Control Standard Endotoxin, CSE, Associate of Cape Cod, Inc., Eastham, MA, USA) by endotoxin-free water (LAL Reagent Water, Associate of Cape Cod, Inc., Eastham, MA, USA). The LAL agent (Associate of Cape Cod, Inc., Eastham, MA, USA) diluted in the Glucashield Beta Glucan Inhibiting Buffer (Associate of Cape Cod, Inc., Eastham, MA, USA) was used in the assay according to the manufacturer's guidelines. The standards, negative controls and air samples were pre-incubated and analyzed using a microplate reader running SoftMaxPro 5.4.1 software (SpectraMax 340; Molecular Devices, Sunnyvale, CA) with photometric measurements taken at 37°C every 1min for 60 min at 405 nm. The viability of bacteria in the particulate matters was studied using a live/dead viability kit (L7012 BacLight Viability Kit, Invitrogen) as described in Supplementary Text. PM-borne reactive oxygen species (ROS) and metal analysis for



certain air samples collected were conducted using DTT assay and ICP-MS as documented in Supplementary Text.

## **2.4 Air mass back-trajectory analysis with cluster**

Air mass transport for three-days was studied during certain air pollution episodes using HYSPLIT Trajectory Model(NOAA) via Hysplit 4 software. The climate data from GDAS1(<ftp://arlftp.arlhq.noaa.gov/pub/archives/gdas1/>) were used for simulation.

## **3. Statistical analysis**

The mass distribution mode differences between the hazy day and clean day were analyzed by two-way ANOVA. Other difference analyses were performed using the paired t-test. All tests were performed using the statistical components from the SigmaPlot 12.5 software. Non-metric Multi-Dimensional Scaling (NMDS) based on Bray-Curtis distance was used to compare bacterial community structures among samples. NMDS was performed by R software (version 3.2) with the vegan package 2.0-10. A p-value of 0.05 indicates a statistically significant difference in this work.

## **4. Results and discussion**

### **4.1 Size-resolved PM mass and composition during different pollution episodes**

Here, we presented our results about PM loading and bacterial aerosol increases in the air from our 24-hr monitoring of four high PM pollution episodes in Beijing during 2017-2018. On Sept 11-14, 2017, in contrast to peak levels in the size range of

3.2 to 5.6  $\mu\text{m}$  on clear days ( $\text{PM}_{2.5}=21.42 \mu\text{g}/\text{m}^3$ ), significant  $\text{PM}_{2.5}$  fraction increases from less than 30% to up to 90% of the total mass were detected in the size range of 0.56 to 1  $\mu\text{m}$  during the haze episodes ( $\text{PM}_{2.5}=91.33 \mu\text{g}/\text{m}^3$ ) as observed in Figure 1 (A), seconded by those appearing in 0.32-0.56  $\mu\text{m}$  size range. For particles of 0.24-0.74  $\mu\text{m}$ , their mass percentages all increased (p-value<0.001; two-way ANOVA), but others did not decrease significantly (p-value=0.198-0.64) as seen in Figure 1 (A) during the haze episodes. The data observed in Figure 1 (A) are generally in line with other studies in which the same particle size range, i.e., 0.56-1  $\mu\text{m}$ , was detected to have the highest mass increases during typical high PM pollution episodes in Beijing (Sun et al., 2015; Yue et al., 2018). This phenomenon was also observed during the haze episodes in other places, such as Taiwan (Tsai et al., 2012) and Singapore (Behera et al., 2015), though different from the firework-caused air pollution scenario (Jing et al., 2014). Similarly, we have also observed that for both size ranges (0.32-0.56  $\mu\text{m}$  and 0.56-1  $\mu\text{m}$ ) metals such as Al, Fe, Mg and Zn have all increased during the haze days (B-day and C-night) (Supporting Information Figure S1). For metal Al, Fe and Zn, more emissions were found in the size range of 0.56 - 1  $\mu\text{m}$  during the day than during the night as shown in Figure S1. Particularly, during the haze episodes (B-day and C-night) high Fe levels were detected in 0.32-0.56  $\mu\text{m}$  size range during the night as observed in Figure S1.

For other trace metals as shown in Supporting Information (Figure S3), two size ranges have not experienced major changes. As for metal As, significant elevation was

detected during the daytime, especially in the size range of 0.32 to 0.56  $\mu\text{m}$  during the haze episode. For the C-Day as referred in Figure 1, the metal As (coal combustion indicator) seemed to have shifted from size of 0.32-0.56  $\mu\text{m}$  during the night to the size of 0.56-1  $\mu\text{m}$  during the day. For Ni, even for the clear day (A) higher concentration levels were detected in the size range 0.56-1  $\mu\text{m}$ , and no elevated levels were detected during the haze episodes, suggesting that Ni contribution from fugitive dusts or industrial activities might be insignificant for the haze formation studied in this work. For both size ranges (0.32-0.56  $\mu\text{m}$ ) and (0.56-1  $\mu\text{m}$ ), metals such as Mn, Cu, Se, Ba and Pb were detected to have higher levels than those during the clear day. As can be seen from the figure, during the nighttime higher element Se levels were detected for the C-day (higher  $\text{PM}_{2.5}$  levels) in the size range of 0.32 to 0.56  $\mu\text{m}$ , however during the daytime peak Se levels were found in the size range of 0.56-1  $\mu\text{m}$ , suggesting Se-containing particles have possibly shifted from smaller sizes to larger sizes. Se is an indicator for coal combustion, and its elevated levels in the particle peak size suggest the coal combustion was one of the driving factors for the haze formation.

To further study  $\text{PM}_{2.5}$  formation during polluted days, we analyzed the K, P, and Ca elements from bio-mass burning in the PM samples for different size ranges as shown in Figure 1 (B) and Figure S3. The data in these figures suggest that the elements such as K might have shifted to different size ranges during the dynamic aerosol processes. Here, we have also studied  $\text{SO}_4^{3-}$ ,  $\text{NO}_3^-$  and  $\text{NH}_4^+$  concentration levels in the particles of 0.32-0.56  $\mu\text{m}$  and 0.56-1  $\mu\text{m}$ , and as observed in Figure 1 (C) their

concentration levels were all elevated during the high pollution episodes (e.g., the C-day with higher NO<sub>2</sub> levels as shown in Figure S2 (Supporting Information)) in contrast to low levels (e.g., the A-day). Literature data show that during a typical haze episode of Beijing sulfate production (Figure S2 showing a higher SO<sub>2</sub> level between 13 and 14, Sept, 2017) is a major contributor to PM<sub>2.5</sub> increase (Wang et al., 2016). Here, we also investigated the toxicity of size-resolved PM samples collected from different time periods (daytime and nighttime) and found as shown in Figure 1 (D) that for the size ranges of 0.24-0.74 µm the average PM<sub>2.5</sub> toxicity (oxidative potential) was higher during the night than during the day though at a lower confidence level (p-value=0.190), suggesting possible particle composition change during the day. For example, metals such as Fe and As, contributors to PM oxidative potential, in smaller sizes were observed here to have shifted to larger ones. Overall, the observed particle loadings and related chemical compositions here agree with those reported in the literature.

## **4.2 Massive changes in time-resolved bacterial aerosol concentration and viability in highly polluted air**

Importantly, we have here observed pronounced bacterial aerosol changes in viability for highly polluted days C-night (PM<sub>2.5</sub>=108 µg/m<sup>3</sup>) and B-day (PM<sub>2.5</sub>=80 µg/m<sup>3</sup>) as shown using viable bacterial percentages in Figure 2 (A) and Supporting Information (Figure S4, S5). Here, we have simultaneously observed the elevated levels of bacterial growth materials such as ions (NO<sub>3</sub><sup>-</sup>, NH<sub>4</sub><sup>+</sup>, etc) as shown in Figure 1 (C) at the same size ranges as discussed above, which co-occurred with increases in bacterial cells and viability as shown in Figure 2 (A). Through fluorescent microscopic analysis of the size-

resolved PM samples collected using the NanoMoudi as shown in Figure S4, S5 (Supporting Information), we have found that the size-resolved bacterial percentages have varied over the time. For example, as shown in Figure 2 (A) during the low PM<sub>2.5</sub> day (A-day) most of the bacteria were in the larger size ranges (larger than 1 µm) during the nighttime, however during the daytime the peak (about 22%) shifted to the size range of 0.56-1 µm. Likewise, similar findings were observed for the high PM<sub>2.5</sub> day (B) except the percentage was detected to be up to 35%. In contrast, for the high PM<sub>2.5</sub> day (C) the peak significantly decreased from 0.56-1 µm to larger sizes from the nighttime to daytime. The C-day witnessed a decrease of PM<sub>2.5</sub> levels. For both A-Day and C-Day, the total bacteria have decreased from nighttime to daytime, however for the B-day the total bacteria increased from nighttime to daytime. In addition to microscopic analysis, we have also performed qPCR analysis for the size-resolved bacterial aerosol samples as shown in Figure S6 (Supporting Information). Overall, the qPCR data agreed well with the microscopic data (Supporting Information Figure S4). The total bacteria seemed to have decreased from nighttime to daytime, however for a particular size range, e.g., 0.56-1 µm, their percentages have increased from nighttime to daytime. Overall, these data revealed that bacterial levels in the size ranges of 0.56-1 µm have changed from nighttime to daytime, implying a changing bacterial aerosol dynamic under different time and pollution conditions.

Using BackLight DNA stain method, 50-70% of viable bacteria were found in the size range of 0.56-1 µm as observed in Figure 2 (B) and Figure S4, S5 for the A-day and B-day (haze formation day) during the daytime, while less than 20% of viable bacteria

for the C-day (haze disappearing day) was noted. In contrast, during the nighttime, the peak for viable bacteria about 30% was found at 0.32-0.56  $\mu\text{m}$  for B-night, close to 60% found at the 0.56-1  $\mu\text{m}$  for C-night and about 10% for the A-night (Supporting Information Figure S5). The size-resolved percentages of viable bacteria for three different days (A- “biomass burning” day, B-“haze formation” day, C-“haze disappearing” day) were observed to have changed substantially (Supporting Information Figure S5). For dead bacteria, as shown in the figure, in the size range of 0.56-1  $\mu\text{m}$ , higher percentage was observed for the C-day, and the lowest for the B-day (the haze formation day) during the nighttime. However, for the daytime, the highest percentage was observed in the size range of 5.6-10  $\mu\text{m}$  for the C-day (haze disappearing day). The percentages for the A- and B-day were found to be similar as seen in the figure. In this work, we have also analyzed the endotoxin (a bacterial derivative) levels during the nighttime and daytime for three different dates (A, B, and C) as shown in Supporting Information Figure S7. As shown in the figure, for the A- and B-day most of the endotoxin was detected in the smaller size ranges of 0.032 -0.18  $\mu\text{m}$ , while during the daytime most of the endotoxin was detected in the larger sizes of > 3.2  $\mu\text{m}$ . In this work, we have also observed that the endotoxin levels for those hazy days (B and C) were found to be higher than the clear day (A) with lower  $\text{PM}_{2.5}$  levels for 1-18  $\mu\text{m}$  size range (p-value=0.023), although no statistically significant differences were detected between daytime and nighttime. In a previous work, Wei et al. also reported that endotoxin concentration in the PM was elevated up to 12.4 EU/ $\text{m}^3$  during a haze episode in Beijing, about twice that during a clear day(Wei et al., 2016). All the data

including the microscopic data (size-resolved percentages of viable bacteria, qPCR, viability and endotoxin, total bacteria) together with favorable bacterial growth conditions suggest that bacteria in the size range of 0.56- 1 $\mu$ m could have played a non-neglected role for air pollution episodes.

To further understand the problem with bacteria in highly polluted air, we have conducted another three different sets of experiments on May 12-13, 2018, March 10-12, 2018, and Feb 6-7, 2018. Different from the first NanoMoudi experiment, we took time-resolved air samples (20 m<sup>3</sup> air for 20 min) using a high-volume sampler (HighBioTrap, dBlueTech Co., Ltd, Beijing China) every two hours for different time periods to capture the bacterial growth events. As seen from Figure 2 (A, B, C), at 16:00 of May 12 with a PM<sub>2.5</sub> level up to 160  $\mu$ g/m<sup>3</sup>, we have detected a significantly higher bacterial aerosol concentration using qPCR, which also corresponded to higher viable bacterial levels (53,037 cells/m<sup>3</sup>) as detected using DNA stain (Figure 2 (C)). For other time periods, the bacterial aerosol concentration levels were detected to decrease substantially (2 hours after the high PM episode) as shown in Figure 2 (B) down to 1689 cells/m<sup>3</sup> as shown in Figure 2 (A) by qPCR; Figure 2 (B) and Figure 2 (E) by DNA stain, respectively for different PM<sub>2.5</sub> levels. Figure 2 (F) shows the culturable bacteria for 1.33 m<sup>3</sup> air sampled during different PM<sub>2.5</sub> levels, and the results were comparable to those detected using DNA stain method as shown in Figure 2 (C), Figure 2 (D) and Figure 2 (E). As observed in Figure 2 (F), substantially higher bacterial concentration levels were observed for higher PM<sub>2.5</sub> levels (160  $\mu$ g/m<sup>3</sup>). Wei et al. reported that the

viable bioaerosol particle concentration increased over a 6-fold at night or early dawn during the haze episode compared with that on clean day(Wei et al., 2016). Culturable bacteria concentrations during the haze days were also observed to be higher than those during the non-haze days(Li et al., 2015). In another work aerosolized bacteria were shown to experience metabolic activity in the simulated air state when supplied with carbon source (Krumins et al., 2014). However, Amato et al. reported that after the 18h aerosolization of the bacteria into the air its cultivable bacterial percentage if without adding nutrients started to decrease down to 4% (Amato et al., 2015). Our data from qPCR, DNA stain, and culturing in these sets of experiments as illustrated in Figure 2 further reveal that massive changes in time-resolved bacterial aerosol dynamics are taking place in highly polluted air, e.g., during haze episodes in Beijing.

### **4.3 Massive time-resolved bacterial community structure shifts in highly polluted air**

To further investigate the specific bacterial species that have experienced the massive changes in the polluted air, the collected air samples were sequenced and also analyzed using ion chromatography methods (both VITEK MS and Microflex). Here, we have found as shown in Figure 3 (A) that during clear days (14 to 93  $\mu\text{g}/\text{m}^3$ ) as a control on Feb 6-7, 2018 regardless of the sampling time periods, the bacterial structures remained to be relatively uniform for most of the studied time. Nonetheless, we have still detected a difference in bacterial structures as seen in Figure 3 (A) for the time of 20:00PM on Feb 6, 2018, showing an increase in abundances of *Ralstonia* and *Acinetobacter*. Interestingly, this event also co-occurred with a higher PM<sub>2.5</sub> level, i.e.,



75  $\mu\text{g}/\text{m}^3$ . For the clear day, among those bacterial genera detected, *Ralstonia* and *Acinetobacter* were found to be most abundant. Besides, *Psychrobacter* and *Massilia* were also detected among the top 20 genera. In contrast, as shown in Figure 3 (B) the bacterial structures varied greatly within a day during the haze days ( $\text{PM}_{2.5}$  level up to 251  $\mu\text{g}/\text{m}^3$ ) on March 10-12, 2018. Among the bacterial genera detected, *Psychrobacter*, *Massilia*, *Acinetobacter*, and *Arthrobacter* were found to dominate the community structure. During low level of air pollution episodes as shown in Figure 3 (A), *Ralstonia* was detected to be the second dominant species up to 4.16-14.66%, however during high pollution episodes ( $\text{PM}_{2.5}$  concentration up to 251  $\mu\text{g}/\text{m}^3$ ), *Ralstonia* was found to only account for 0-0.78% of the total abundances, a substantial decrease. For certain time periods (from 8:00 AM on March 11 to 12:00 AM on March 13), as observed in Figure 3 (B) when the  $\text{PM}_{2.5}$  levels increased the relative abundances of *Psychrobacter*, *Massilia* and *Acinetobacter* witnessed sharp increases up to about 96% at the corresponding  $\text{PM}_{2.5}$  level of 208  $\mu\text{g}/\text{m}^3$ . The bacterial community structure differences are much visible as seen by the genus heatmap shown in Figure 3 (C) for March 10-12, 2018.

To further investigate the problem and confirm these findings, we have conducted another set of different experiments on May 12, 2018 using similar methods. In contrast to other experiments, culturable *Acinetobacter lwoffii*, *Bacillus cereus*, *Bacillus pumilus*, *Exiguobacterium aurantiacum*, *Arthrobacter ilicis*, *Bacillus cereus*, *Bacillus megaterium*, *Coriobacterium* were detected to be abundant using colorimetry

methods including VITKE MS (BioMérieux) and microflex (Bruker) (two methods confirmed with each other for specific species) as seen in Figure 3 (D) and Figure 3 (E). Among these species, *Acinetobacter lwoffii*, *Exiguobacterium aurantiacum*, and *Bacillus pumilus* were found to be most abundant. *Bacillus pumilus* and *Exiguobacterium aurantiacum* are often used in wastewater treatment practices, while *Acinetobacter lwoffii* is a human pathogen. The differences observed in bacterial aerosol dynamics in different PM pollution episodes indicate that air pollution episodes could varied from one to another in their characteristics. For low and high PM pollution levels, the bacterial aerosol dynamics appeared to be very different. For low level PM pollution, the bacterial aerosol structures remained to be relatively constant, in contrast bacterial structures experienced rapid changes during the day not only in abundances but also in species, e.g., several species such as *Psychrobacter* could account for more than 90% of the total abundance as shown in Figure 3 (B). Among the detected species, *Psychrobacter* is a psychrophilic bacterium and used in wastewater treatment(Huang et al., 2018), while *Massilia* is also used in degrading water-borne PAH(Chadhain et al., 2006). The results obtained in this repeated experiment on a different haze day further strengthen the fact that rapid and time-resolved massive changes in bacterial aerosol dynamics have taken place for different PM<sub>2.5</sub> pollution levels.

Additionally, it is highly interesting that as shown in Figure 4 (A) for the same time, i.e., at 20:00PM on Feb 6, 2018 elevated levels of soluble Na, Ca,Mg, K, Al, Fe and P

were observed, which co-occurred with significant bacterial aerosol species shift (*Acinetobacter* increased significantly) as observed in Figure 3 (A). The Ca ion level was observed more than 0.55  $\mu\text{g}/\text{m}^3$ , followed by Na, Mg, K and others as shown in Figure 4 (A). These element ions are necessary for bacterial growth. Likewise, for March 10-13 experiments, several different ion peaks were observed as shown in Figure 4 (B). For those samples collected at 20:00PM of March 11 ("11-20" in the figure) and 08:00AM of March 12 ("12-8" in the figure), elevated Ca, Na and Mg levels were also observed up to 0.9  $\mu\text{g}/\text{m}^3$  for Ca ion, corresponding to significant bacterial aerosol shifts as observed in Figure 3 (B). It seems that as observed in Figure 3 (B) and Figure 4 (B) *Acinetobacter* and *Massilia* alternated to dominate the bacterial aerosol community structures. When Ca ion level increased *Acinetobacter* started to dominate, while Na level increased *Massilia* started to dominate. The co-occurrence of time-resolved element ion elevation with time-resolved bacterial aerosol structure shift suggest the ions must have been to some extent related to bacterial aerosol dynamics in the air. In addition, we have also constructed a HYSPLIT Trajectory Model for air mass transport for March 10-13, 2018 experiment as shown in Figure 5. As seen from the figure, during the episode air mass was transported from four different directions with different contributions up to 30% of the total transport. In addition, as shown in Figure 5 along the transport directions most of  $\text{PM}_{2.5}$  levels were below 100  $\mu\text{g}/\text{m}^3$ . Accordingly, it is hard to believe that regional air mass transport contributed directly to the rapid shifts in bacterial aerosol structure shifts, viability and levels.

#### **4.4 A new frame for understanding air pollution episodes**

Air pollution has resulted in tremendous loss of life and economy every year worldwide. Huge amount of research has already been devoted to studying the haze formation and the aerosol chemistry mechanisms(Wang et al., 2006;Zhao et al., 2013;Liu et al., 2013). However, microbial aerosols rarely been considered to play a role in aerosol chemistry especially in highly polluted air. Previously, we have shown using a laser-induced fluorescence-based method that the viable bacterial aerosol concentration was significantly elevated during high PM<sub>2.5</sub> pollution episodes in Beijing(Wei et al., 2016). Here, for the first time we have captured the size-and time-resolved massive microbial level increase and structure shift events in high PM<sub>2.5</sub> polluted air in Beijing using a high-volume portable aerosol sampler up to 1000 L/min. Traditionally, people often use low flow rate sampler such as BioSampler (SKC, INc., flow rate=12.5 L/min) and the 4-channel PM sampler (16.7 L/min) or sometimes up to 100 L/min, but most for short time samplings(Gao et al., 2015b;Yuan et al., 2017). These samplers with low sampling rates often fail to capture rapid but transient microbial events in the air since newly bacterial aerosol dynamics could be quickly diluted by open ambient air, and such time-resolved events could also discontinue as atmospheric conditions change from the air. For example, through NMDS analysis we detected a difference in bacterial community structures in the samples collected by the HighBioTrap sampler, but not those collected using the 4-Channel PM sampler (16.7 L/min) as shown in Figure S9 (Supporting Information). Here, by applying a high volume sampler we were able to successfully capture the time-resolved changes in

microbial aerosol dynamics in the air.

Accordingly, based on the results obtained here we hypothesize a new haze formation mechanism, i.e., some new aerosol chemistry for highly polluted air as illustrated in Figure 6. As depicted from the figure, bacteria are presumed to be emitted from ground due to various human activities into the air. As such an evidence shown in Figure S10, we found that the bacterial aerosol concentration level exceeded 3000 CFU/m<sup>3</sup> in a pharmaceutical plant in China. In addition, sequence data shown in Figure S11 (Supporting Information) showed that *Acinetobacter*, *Psychrobacter*, *Exiguobacterium*, and *Bacillus* genera were emitted and detected to dominate airborne bacterial community in workshop air inside the pharmaceutical plant. As discussed, these bacteria were also detected in the ambient air in Beijing during the haze episodes, and some of these bacteria experienced rapid concentration changes in the air as presented in Figure 3. Besides, the total VOC concentration for one chimney (pharmaceutical waste treatment workshop) inside the plant was observed to reach a level of 15,030 ppbv, which mainly consisted Acetone (61%) and Acetaldehyde (11%) as seen in Figure S12(Supporting Information). These data support our claim that ground human activities such as pharmacy producing could emit large amounts of bacteria into the air, which were also detected in highly polluted air. As detected in the air samples in this work, the nutrients for bacterial growth such as NH<sub>4</sub><sup>+</sup>, NO<sub>3</sub><sup>-</sup>, Ca, Na, K, Mg, etc. along with other favorable conditions such as RH and gases are readily available in highly polluted atmosphere such as haze episodes in Beijing,

accordingly providing required conditions for bacterial growth. Accordingly, we hypothesize that the bacterial growth in the air could have taken place during air pollution episodes as depicted in Figure 6. The bacterial growth typically can undergo for different cycles (in general ~20-30 min per cycle), depending on the availability of various conditions such as nutrients, RH and temperature. As hypothesized in Figure 6, for typical high PM pollution episodes, atmospheric boundary layer is lowered(Quan et al., 2014), thus leading to increases in ambient pollutant concentrations such as VOC, NH<sub>3</sub>, NO<sub>x</sub>, etc. Under these conditions, the airborne bacteria such as *Acinetobacter lwoffii*, *Bacillus cereus*, *Bacillus pumilus*, *Exiguobacterium aurantiacum*, *Arthrobacter ilicis*, *Bacillus cereus*, *Bacillus megaterium*, *Coriobacterium* emitted from ground human activities, e.g., as demonstrated from a pharmaceutical or a wastewater treatment plant, as hypothesized in Figure 6 can play an important role for atmospheric carbon and nitrogen cycles during their growth, thus influencing aerosol chemistry.

Studies show that bacteria can use VOC as nutrient(Paavolainen et al., 1998;Krumins et al., 2014), degrade PAH(Chadhain et al., 2006), oxidize NO<sub>x</sub>(Lambeth, 2004) and scavenge OH radicals(Samake et al., 2017), and at the same time bacteria can also release many mVOCs during their growth(Schulz and Dickschat, 2007). According to the literature, these mVOCs are often small molecular weight molecules (<300 Da) such as hydrocarbons, alcohols, aldehydes and ketones), terpenoids, aromatic compounds, nitrogen containing compounds and volatile sulphur

compounds(Lemfack et al., 2013). For example, *Acinetobacter calcoaceticus* can emit 2-oxoethanesulfonic Acid (LogP=-1.18; C<sub>2</sub>H<sub>4</sub>O<sub>4</sub>S) (Schulz and Dickschat, 2007) which is classified as a sulfate and belongs to semi-volatile VOC (sVOC). And *Pseudomonas fluorescens* can emit low volatility Methylsulfonylsulfanylmethane (C<sub>2</sub>H<sub>6</sub>O<sub>2</sub>S<sub>2</sub>, LogP= -0.06)(Hunziker et al., 2014). In this work, we also detected higher abundance of *Acinetobacter* during higher PM pollution episodes. On the other hand, *Ralstonia solanacearum* can emit nitrogen containing compounds such as 2-chloro-2-nitropropane (C<sub>3</sub>H<sub>6</sub>ClNO<sub>2</sub>)(Spraker et al., 2014). In our work, we have detected higher abundance of *Ralstonia* species in our work as shown in Figure 3 A). In another work, it was shown that *Psychrobacter* spp. can emit 2,3-Dimethyl-oxirane, 2-Butanone, 2-Formylhistamine, 2-Methyl-2-propanol, Acetaldehyde, Acetone, Ethylene oxide, Isopropylalcohol, and Trimethylamine(Broekaert et al., 2013). For a complete reference to mVOC emitted by both bacteria and fungi, there is a database available in the literature(Lemfack et al., 2013). As seen from the database, bacteria, depending on the species type, could emit mVOCs containing sulfur, nitrogen or simply hydrocarbon<sup>35</sup>. These smaller molecules (mVOCs) can be further oxidized into ultrafine particles under oxidizing environments, and some of them are sVOC with lower vapor pressure.

These analyses led to our belief that the bacterial growth, accordingly emitting mVOCs as new particle precursors, in the air could play a very important role for new particle formation as hypothesized in Figure 6. From the literature, we have found that

new particle formation occurred during the early mornings (04:00-06:00) or during the afternoon time period (18:00-22:00) (Liu et al., 2008; Wang et al., 2014). During these same time periods, massive changes in bacterial aerosol levels and structure shifts were also observed in our work as shown in Figure 1-3. As illustrated in Figure 6, these ultrafine particles eventually could grow into fine particles via hygroscopic growth or through atmospheric oxidization (Guo et al., 2014). Depending on the bacterial species or the ambient pollutants, major components of the sVOC ultrafine particles emitted if any in the air as hypothesized could be organic compounds, nitrogen containing or sulfates, thus likely impacting haze episode dynamics. Simultaneously, airborne bacteria can also scavenge OH radicals (Samake et al., 2017) and react with metals such as Fe (Chen et al., 2013) in the water layer as depicted in Figure 6. During a certain time period, the available nutrients for bacteria are depleting in the atmosphere, then the bacterial growth may slow down and eventually stop. From our observations, these bacteria are mostly in the size range 0.5-1  $\mu\text{m}$ , and those newly produced ones can be quickly attached by atmospheric ultrafine particles or form aggregates, which could later grow into bigger particles and settle to the ground. When the latter occurs, the high PM pollution episode is disappearing. Here, some psychrophilic bacteria were also detected, indicating microbial growth in the cold air could also occur, e.g., during the winter periods when frequent hazes occur. Those bacteria trained for engineering purposes can also significantly impact human health and ecology when they have undergone growth if any in the air and further precipitated into the local environments or inhaled by humans during high air pollution episodes. For example, we have



detected abundant human pathogen such as *Acinetobacter lwoffii* in highly polluted air, which thus presents a significant public health concern. The hypothesized bacterial growth in the air partly could explain the underestimates (e.g. HCHO was underestimated by about 16% compared to observation) of atmospheric VOCs by current models, and also the under-prediction (about 30%) of OH radical loss rate (OH radicals react with VOCs)(Whalley et al., 2016). Here, we only investigated the bacterial dynamics, while those airborne fungal species could also have an impact in the air under favorable conditions. This work was mainly conducted in Beijing, and certainly many other urban settings are warranted to further verify the findings from this work. The results from this work provide a new understanding of current aerosol chemistry known so far especially in highly polluted air. The relevant results might find their values in future cost-effective air pollution control practices. The hypothesized airborne bacterial growth mechanism can be explored using an isotope-based experimental method in future studies.

## 5.Acknowledgements

This study was supported by the NSFC Distinguished Young Scholars Fund Awarded to M. Yao (21725701), and the National Natural Science Foundation of China (Grants 91543126, 21611130103, 21477003, 41121004), the Ministry of Science and Technology (grants 2016YFC0207102, 2015CB553401, and 2015DFG92040).

## 6.Author contribution

MY designed the study, TZ performed the experiments, XL, MW helped conducting some of the samplings, XL, HC collected the air samples from the pharmaceutical plant. TZ and MY prepared the manuscript with contributions from all co-authors. The results here only represent scientific evidences and the authors' understanding of the problem.

## 7. References

Amato, P., Joly, M., Schaupp, C., Attard, E., Möhler, O., Morris, C., Brunet, Y., and Delort, A.-M.: Survival and ice nucleation activity of bacteria as aerosols in a cloud simulation chamber, *Atmospheric Chemistry and Physics*, 15, 6455-6465, doi:[10.5194/acp-15-6455-2015](https://doi.org/10.5194/acp-15-6455-2015), 2015.

Behera, S. N., Betha, R., Huang, X., and Balasubramanian, R.: Characterization and estimation of human airway deposition of size-resolved particulate-bound trace elements during a recent haze episode in Southeast Asia, *Environmental Science and Pollution Research*, 22, 4265-4280, doi:[10.1007/s11356-014-3645-6](https://doi.org/10.1007/s11356-014-3645-6), 2015.

Broekaert, K., Nosedá, B., Heyndrickx, M., Vlaemynck, G., and Devlieghere, F.: Volatile compounds associated with *Psychrobacter* spp. and *Pseudoalteromonas* spp., the dominant microbiota of brown shrimp (*Crangon crangon*) during aerobic storage, *International Journal of Food Microbiology*, 166, 487-493, doi:[10.1016/j.ijfoodmicro.2013.08.013](https://doi.org/10.1016/j.ijfoodmicro.2013.08.013), 2013.

Cao, C., Jiang, W., Wang, B., Fang, J., Lang, J., Tian, G., Jiang, J., and Zhu, T. F.: Inhalable microorganisms in Beijing's PM<sub>2.5</sub> and PM<sub>10</sub> pollutants during a severe smog event, *Environmental Science & Technology*, 48, 1499-1507, doi:10.1021/es4048472, 2014.

578 Chadhain, S. M. N., Norman, R. S., Pesce, K. V., Kukor, J. J., and Zylstra, G. J.: Microbial  
579 dioxygenase gene population shifts during polycyclic aromatic hydrocarbon  
580 biodegradation, *Applied and Environmental Microbiology*, 72, 4078-4087, doi:  
581 10.1128/AEM.02969-05, 2006.

582 Chen, H., and Yao, M.: A high-flow portable biological aerosol trap (HighBioTrap) for  
583 rapid microbial detection, *Journal of Aerosol Science*, 117, 212-223, doi:  
584 10.1016/j.jaerosci.2017.11.012, 2018.

585 Chen, Q., Li, J., Wu, Y., Shen, F., and Yao, M.: Biological responses of Gram-positive and  
586 Gram-negative bacteria to nZVI (Fe 0), Fe 2+ and Fe 3+, *RSC Advances*, 3, 13835-13842,  
587 doi: 10.1039/C3RA40570B, 2013.

588 Fröhlich-Nowoisky, J., Kampf, C. J., Weber, B., Huffman, J. A., Pöhlker, C., Andreae, M.  
589 O., Lang-Yona, N., Burrows, S. M., Gunthe, S. S., and Elbert, W.: Bioaerosols in the Earth  
590 system: Climate, health, and ecosystem interactions, *Atmospheric Research*, 182, 346-  
591 376, doi: 10.1016/j.atmosres.2016.07.018, 2016.

592 Gao, J.-F., Fan, X.-Y., Pan, K.-L., Li, H.-Y., and Sun, L.-X.: Diversity, abundance and activity  
593 of ammonia-oxidizing microorganisms in fine particulate matter, *Scientific Reports*, 6,  
594 38785, doi: 10.1038/srep38785, 2016.

595 Gao, M., Jia, R., Qiu, T., Han, M., Song, Y., and Wang, X.: Seasonal size distribution of  
596 airborne culturable bacteria and fungi and preliminary estimation of their deposition  
597 in human lungs during non-haze and haze days, *Atmospheric Environment*, 118, 203-  
598 210, doi: 10.1016/j.atmosenv.2015.08.004, 2015a.

599 Gao, M., Qiu, T., Jia, R., Han, M., Song, Y., and Wang, X.: Concentration and size

600 distribution of viable bioaerosols during non-haze and haze days in Beijing,  
601 Environmental Science and Pollution Research, 22, 4359-4368, doi: 10.1007/s11356-  
602 014-3675-0, 2015b.

603 Guo, S., Hu, M., Zamora, M. L., Peng, J., Shang, D., Zheng, J., Du, Z., Wu, Z., Shao, M.,  
604 and Zeng, L.: Elucidating severe urban haze formation in China, Proceedings of the  
605 National Academy of Sciences, 111, 17373-17378, doi: 10.1073/pnas.1419604111,  
606 2014.

607 Huang, X., Ding, A., Liu, L., Liu, Q., Ding, K., Niu, X., Nie, W., Xu, Z., Chi, X., and Wang,  
608 M.: Effects of aerosol-radiation interaction on precipitation during biomass-burning  
609 season in East China, Atmospheric Chemistry & Physics, 16, 10063–10082,  
610 doi:10.5194/acp-16-10063-2016, 2016.

611 Huang, Z., Wang, Y., Jiang, L., Xu, B., Wang, Y., Zhao, H., and Zhou, W.: Mechanism and  
612 performance of a self-flocculating marine bacterium in saline wastewater treatment,  
613 Chemical Engineering Journal, 334, 732-740, doi: 10.1016/j.cej.2017.10.076, 2018.

614 Hunziker, L., Bönisch, D., Groenhagen, U., Bailly, A., Schulz, S., and Weisskopf, L.:  
615 Pseudomonas strains naturally associated with potato plants produce volatiles with  
616 high inhibition potential against Phytophthora infestans, Applied and Environmental  
617 Microbiology, 8,821-830, doi: 10.1128/AEM.02999-14, 2015.

618 Jing, H., Li, Y.-F., Zhao, J., Li, B., Sun, J., Chen, R., Gao, Y., and Chen, C.: Wide-range  
619 particle characterization and elemental concentration in Beijing aerosol during the  
620 2013 Spring Festival, Environmental Pollution, 192, 204-211, doi:  
621 10.1016/j.envpol.2014.06.003, 2014.

622 Jokinen, T., Berndt, T., Makkonen, R., Kerminen, V.-M., Junninen, H., Paasonen, P.,  
623 Stratmann, F., Herrmann, H., Guenther, A. B., and Worsnop, D. R.: Production of  
624 extremely low volatile organic compounds from biogenic emissions: Measured yields  
625 and atmospheric implications, *Proceedings of the National Academy of Sciences*,  
626 11,7123-7128, doi: 10.1073/pnas.1423977112, 2015.

627 Krumins, V., Mainelis, G., Kerkhof, L. J., and Fennell, D. E.: Substrate-dependent rRNA  
628 production in an airborne bacterium, *Environmental Science & Technology Letters*, 1,  
629 376-381, doi: 10.1021/ez500245y, 2014.

630 Lambeth, J. D.: NOX enzymes and the biology of reactive oxygen, *Nature Reviews*  
631 *Immunology*, 4, 181-189, doi: 10.1038/nri1312, 2004.

632 Lemfack, M. C., Nickel, J., Dunkel, M., Preissner, R., and Piechulla, B.: mVOC: a database  
633 of microbial volatiles, *Nucleic Acids Research*, 42, D744-D748, doi:  
634 10.1093/nar/gkt1250 2013.

635 Li, Y., Fu, H., Wang, W., Liu, J., Meng, Q., and Wang, W.: Characteristics of bacterial and  
636 fungal aerosols during the autumn haze days in Xi'an, China, *Atmospheric Environment*,  
637 122, 439-447, doi: 10.1016/j.atmosenv.2015.09.070, 2015.

638 Liu, H., Zhang, X., Zhang, H., Yao, X., Zhou, M., Wang, J., He, Z., Zhang, H., Lou, L., and  
639 Mao, W.: Effect of air pollution on the total bacteria and pathogenic bacteria in  
640 different sizes of particulate matter, *Environmental Pollution*, 233, 483-493, doi:  
641 10.1016/j.envpol.2017.10.070, 2018.

642 Liu, S., Hu, M., Wu, Z., Wehner, B., Wiedensohler, A., and Cheng, Y.: Aerosol number  
643 size distribution and new particle formation at a rural/coastal site in Pearl River Delta

644 (PRD) of China, Atmospheric Environment, 42, 6275-6283, doi:  
645 10.1016/j.atmosenv.2008.01.063, 2008.

646 Liu, X., Li, J., Qu, Y., Han, T., Hou, L., Gu, J., Chen, C., Yang, Y., Liu, X., and Yang, T.:  
647 Formation and evolution mechanism of regional haze: a case study in the megacity  
648 Beijing, China, Atmospheric Chemistry & Physics, 12, 16259-16292, doi:10.5194/acp-  
649 13-4501-2013, 2013.

650 Paavolainen, L., Kitunen, V., and Smolander, A.: Inhibition of nitrification in forest soil  
651 by monoterpenes, Plant and Soil, 205, 147-154, doi: 10.1023/A:100433541, 1998.

652 Pöschl, U., Martin, S., Sinha, B., Chen, Q., Gunthe, S., Huffman, J., Borrmann, S., Farmer,  
653 D., Garland, R., and Helas, G.: Rainforest aerosols as biogenic nuclei of clouds and  
654 precipitation in the Amazon, Science, 329, 1513-1516, doi: 10.1126/science.1191056 ,  
655 2010.

656 Price, P. B., and Sowers, T.: Temperature dependence of metabolic rates for microbial  
657 growth, maintenance, and survival, Proceedings of the National Academy of Sciences,  
658 101, 4631-4636, doi: 10.1073/pnas.0400522101, 2004.

659 Quan, J., Tie, X., Zhang, Q., Liu, Q., Li, X., Gao, Y., and Zhao, D.: Characteristics of heavy  
660 aerosol pollution during the 2012–2013 winter in Beijing, China, Atmospheric  
661 Environment, 88, 83-89, doi: 10.1016/j.atmosenv.2014.01.058, 2014.

662 Samake, A., Uzu, G., Martins, J., Calas, A., Vince, E., Parat, S., and Jaffrezo, J.: The  
663 unexpected role of bioaerosols in the Oxidative Potential of PM, Scientific Reports, 7,  
664 10978, doi: 10.1038/s41598-017-11178-0, 2017.

665 Šantl-Temkiv, T., Sahyoun, M., Finster, K., Hartmann, S., Augustin-Bauditz, S.,

666 Stratmann, F., Wex, H., Clauss, T., Nielsen, N. W., and Sørensen, J. H.: Characterization  
667 of airborne ice-nucleation-active bacteria and bacterial fragments, *Atmospheric*  
668 *Environment*, 109, 105-117, doi: 10.1016/j.atmosenv.2015.02.060, 2015.

669 Schulz, S., and Dickschat, J. S.: Bacterial volatiles: the smell of small organisms, *Natural*  
670 *Product Reports*, 24, 814-842, doi: 10.1039/B507392H, 2007.

671 Spraker, J. E., Jewell, K., Roze, L. V., Scherf, J., Ndagano, D., Beaudry, R., Linz, J. E., Allen,  
672 C., and Keller, N. P.: A volatile relationship: profiling an inter-kingdom dialogue  
673 between two plant pathogens, *Ralstonia solanacearum* and *Aspergillus flavus*, *Journal*  
674 *of Chemical Ecology*, 40, 502-513, doi: 10.1007/s10886-014-0432-2, 2014.

675 Sun, K., Liu, X., Gu, J., Li, Y., Qu, Y., An, J., Wang, J., Zhang, Y., Hu, M., and Zhang, F.:  
676 Chemical characterization of size-resolved aerosols in four seasons and hazy days in  
677 the megacity Beijing of China, *Journal of Environmental Sciences*, 32, 155-167, doi:  
678 10.1016/j.jes.2014.12.020, 2015.

679 Tsai, J.-H., Lin, J.-H., Yao, Y.-C., and Chiang, H.-L.: Size distribution and water soluble  
680 ions of ambient particulate matter on episode and non-episode days in Southern  
681 Taiwan, *Aerosol and Air Quality Research*, 12, 263-274, doi:  
682 10.4209/aaqr.2011.10.0167, 2012.

683 Wang, G., Zhang, R., Gomez, M. E., Yang, L., Zamora, M. L., Hu, M., Lin, Y., Peng, J., Guo,  
684 S., and Meng, J.: Persistent sulfate formation from London Fog to Chinese haze,  
685 *Proceedings of the National Academy of Sciences*, 113, 13630-13635, doi:  
686 10.1073/pnas.1616540113, 2016.

687 Wang, H., Zhu, B., Shen, L., An, J., Yin, Y., and Kang, H.: Number size distribution of

688 aerosols at Mt. Huang and Nanjing in the Yangtze River Delta, China: Effects of air  
689 masses and characteristics of new particle formation, *Atmospheric Research*, 150, 42-  
690 56, doi: 10.1016/j.atmosres.2014.07.020, 2014.

691 Wang, Y., Zhuang, G., Sun, Y., and An, Z.: The variation of characteristics and formation  
692 mechanisms of aerosols in dust, haze, and clear days in Beijing, *Atmospheric*  
693 *Environment*, 40, 6579-6591, doi: 10.1016/j.atmosenv.2006.05.066, 2006.

694 Wei, K., Zou, Z., Zheng, Y., Li, J., Shen, F., Wu, C.-y., Wu, Y., Hu, M., and Yao, M.: Ambient  
695 bioaerosol particle dynamics observed during haze and sunny days in Beijing, *Science*  
696 *of the Total Environment*, 550, 751-759, doi: 10.1016/j.scitotenv.2016.01.137, 2016.

697 Whalley, L., Stone, D., Bandy, B., Dunmore, R., Hamilton, J. F., Hopkins, J., Lee, J. D.,  
698 Lewis, A. C., and Heard, D. E.: Atmospheric OH reactivity in central London:  
699 observations, model predictions and estimates of in situ ozone production,  
700 *Atmospheric Chemistry and Physics*, 16, 2109-2122, doi: 10.5194/acp-16-2109-2016,  
701 2016.

702 Yuan, H., Zhang, D., Shi, Y., Li, B., Yang, J., Yu, X., Chen, N., and Kakikawa, M.: Cell  
703 concentration, viability and culture composition of airborne bacteria during a dust  
704 event in Beijing, *Journal of Environmental Sciences*, 55, 33-40, doi:  
705 10.1016/j.jes.2016.03.033, 2017.

706 Yue, Y., Chen, H., Setyan, A., Elser, M., Dietrich, M., Li, J., Zhang, T., Zhang, X., Zheng, Y.,  
707 Wang, J., and Yao, M.: Size-resolved endotoxin and oxidative potential of ambient  
708 particles in Beijing and Zürich, *Environmental Science & Technology*, 52, 6816–6824,  
709 doi: 10.1021/acs.est.8b01167, 2018.



Zhao, X., Zhao, P., Xu, J., Meng, W., Pu, W., Dong, F., He, D., and Shi, Q.: Analysis of a winter regional haze event and its formation mechanism in the North China Plain, Atmospheric Chemistry & Physics, 13, 5685-5696, doi: 10.5194/acp-13-5685-2013, 2013.

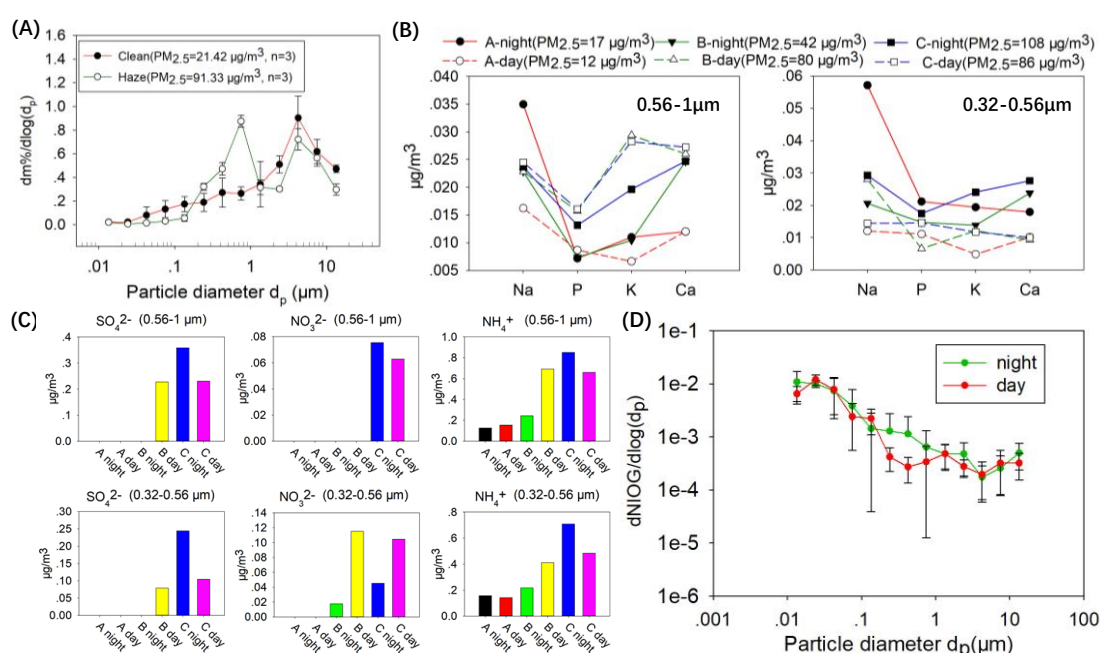

**Figure 1** Rapid particle increase during typical high PM pollution episodes on Sept 11-14, 2017: A) size-resolved particle mass percentage distribution during low ( $21.42 \mu g/m^3$ ) and high ( $91.33 \mu g/m^3$ ) pollution levels ( $PM_{2.5}$  values are averages of three different days (Sept 11-14, 2017); B) Na, P, K, Ca concentration levels in particles of 0.56-1  $\mu m$  and 0.32-0.56  $\mu m$  during different time periods (Day: 7:00AM-19:00PM; Night: 20:00PM-6:00AM on Sept 11-14, 2017) under different PM pollution levels ( $PM_{2.5}=12-108 \mu g/m^3$ ); C)  $SO_4^{2-}$ ,  $NO_3^-$ , and  $NH_4^+$  concentration levels measured using Ion Chromatography (Thermo Scientific, Dionex, ICS 2000 and ICS 2500) in particles of 0.56-1  $\mu m$  and 0.32-0.56  $\mu m$  under different PM pollution levels on Sept 11-14, 2017;

(Corresponding O<sub>3</sub>, NO<sub>2</sub>, SO<sub>2</sub>, CO concentration levels are shown in Supporting Information Figure S2) ; D) Size-resolved (10 nm-20 μm) particle toxicity measured using DTT method during night and day as shown in Figure 1 (B). Air samples were collected using the NanoMoudi sampler at a flow rate of 28 L/min for 12 hours during the Day (7:00 AM to 19:00PM) and 10 hours during the Night (20:00PM to 6:00AM) on Sept 11-13, 2017.

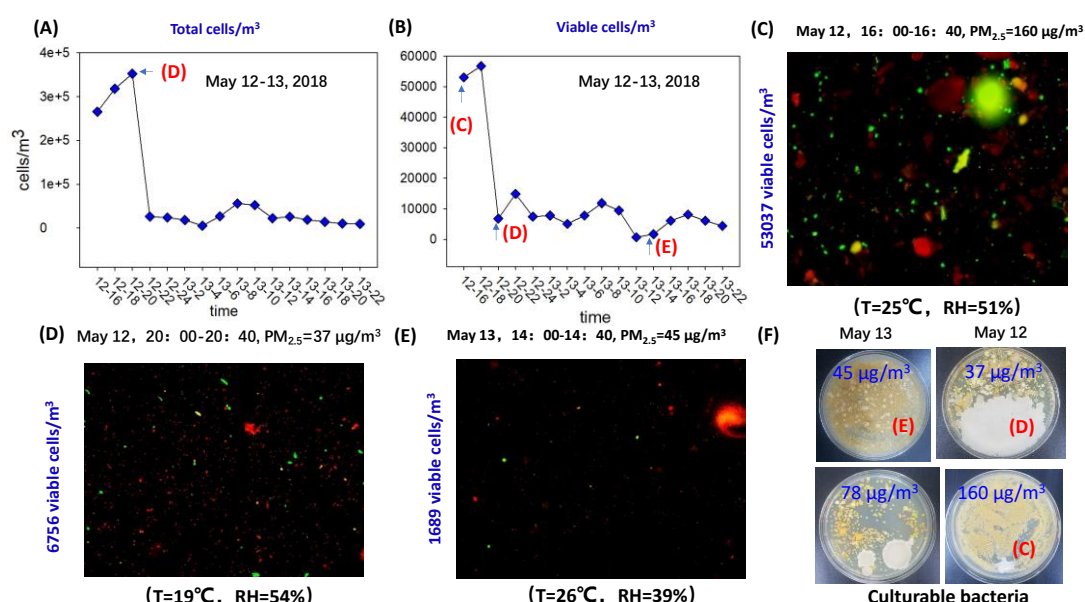

**Figure 2** Time-resolved bacterial aerosol dynamics in highly polluted air: A) Total bacterial aerosol concentration levels detected at different times on May 12-13, 2018 using qPCR; B) Total viable bacterial aerosol particle concentration measured using BackLight DNA stain method for different time periods (the digit separated by “-” represent date and time, respectively, e.g., “12-22” means 22:00PM on May 12) during May 12-13, 2018 under different air pollution levels (37 -160 μg/m³) (PM<sub>2.5</sub> levels for different time periods of May 12-13 are presented in Supporting Information Figure S8); C) Example image of bacterial DNA stain results from air samples collected

during a high PM<sub>2.5</sub> pollution episode (PM<sub>2.5</sub>=160 µg/m<sup>3</sup> at 20:00-20:40 on May 12, 2018); D) Example image of bacterial DNA stain results from air samples collected during a low level PM<sub>2.5</sub> pollution episode (PM<sub>2.5</sub>=37 µg/m<sup>3</sup> at 16:00-16:40 on May 12, 2018); E) Bacterial DNA stain results from air samples collected during a medium level PM<sub>2.5</sub> pollution episode (PM<sub>2.5</sub>=45 µg/m<sup>3</sup> at 14:00-14:40 on May 13, 2018); F) Example images of bacterial aerosol culturing agar plates (1.33 m<sup>3</sup> air collected using the HighBioTrap) under different PM<sub>2.5</sub> mass levels during May 12-13, 2018.

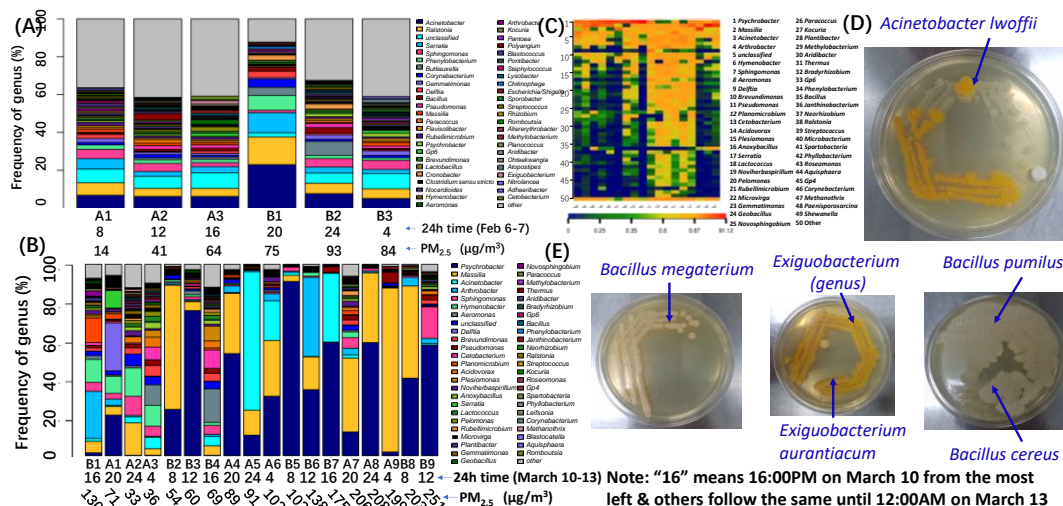

**Figure 3** Dynamics of bacterial community structures for different time periods during typical pollution processes: (A) Bacterial community structures (on Feb 6- 7, 2018) with PM<sub>2.5</sub> levels from 14 to 93 µg/m<sup>3</sup>; (B) Bacterial community structures (from March 10 to 12, 2018) with PM<sub>2.5</sub> levels from 33 to 251 µg/m<sup>3</sup>; (C) Heatmap of bacterial genera structures as shown in Figure 3 (B) on March 10-12, 2018 ; (D) Culturable bacterial isolates detected during May 12, 2018 high PM<sub>2.5</sub> pollution episodes as shown in Figure 2; Two air samples were collected using the HighBioTrap for 20 min each at a flow rate of 1000 L/min, and the samples after the culturing were analyzed using VITKE MS

(BioMérieux) and microflex (Bruker) for their corresponding bacterial species; *Acinetobacter lwoffii* and *Exiguobacterium aurantiacum* were found to be most abundant.

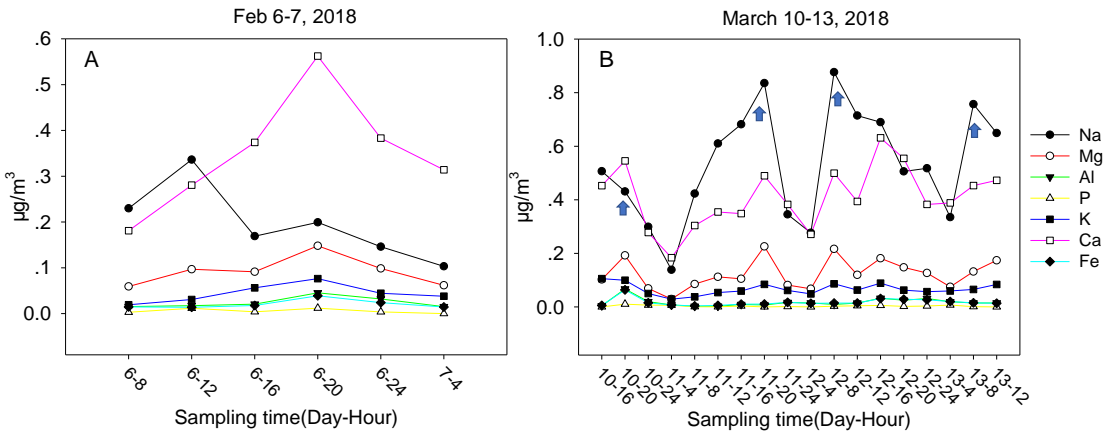

**Figure 4** Time-resolved soluble elements (Na, Mg, Al, P, K, Ca, and Fe) concentrations in PM samples collected using the HighBioTrap sampler as described in Figure 3 during Feb 6-7, 2018 and March 10-13, 2018 experiments: A) Feb 6-7, 2018; and B) March 10-13, 2018.

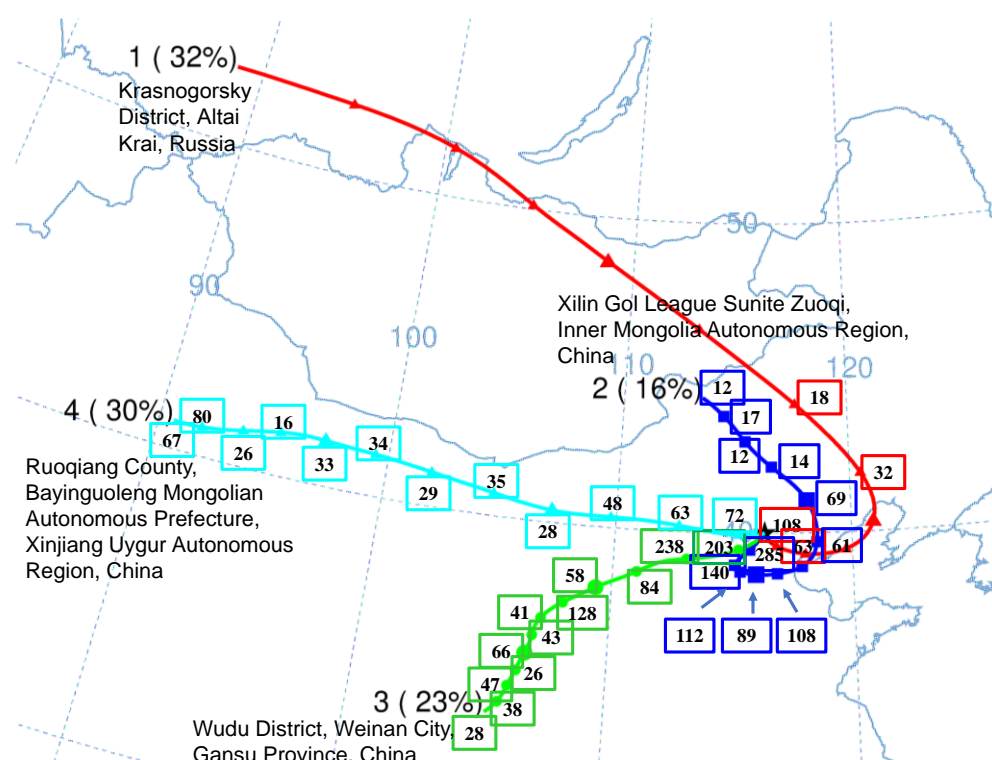

**Figure 5** Air mass transport to Beijing (39.99 N 116.32 E) during the March 10-13, 2018

air pollution episodes using HYSPLIT Trajectory Model (NOAA) via Hysplit 4 software.

Numbers on four different lines represent different PM<sub>2.5</sub> mass concentration levels

(<http://pm25.in/>) (µg/m<sup>3</sup>) when the air mass across. The air mass was transported

from 4 different directions (1-4) as marked in the figure, accounting for 32%, 16%, 23%

and 30% of the total transport contribution (not estimated for its absolute mass

amount).

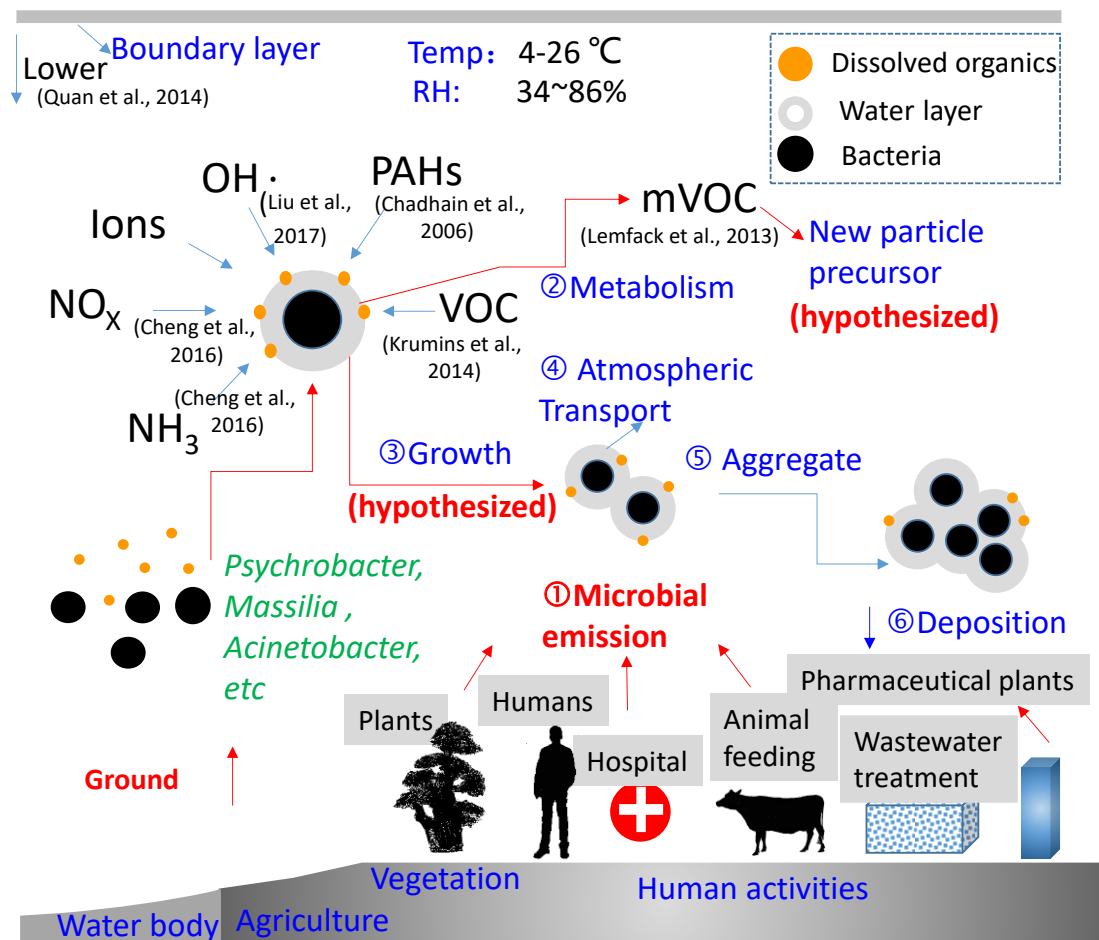

**Figure 6** Hypothesized new mechanisms of bacterial growth in the air and possible roles in aerosol chemistry: Ground-emitted bacteria can uptake water vapor, PAH, VOC, NH<sub>3</sub>, NO<sub>x</sub> and release mVOCs during the growth; mVOCs could serve as new particle precursors; ultrafine particles (dissolved organics) can attach to the bacterial surface and further mix with water; newly produced bacteria can form aggregates and precipitate.
